# Supplementary material for: Generation of a murine SWATH-MS spectral library to quantify more than 11,000 proteins
Source: PubMed Central journal article supplement (PMC7099061; doi:10.1038/s41597-020-0449-z), 2020-03-26
Supplement: 41597_2020_449_MOESM1_ESM.pdf [file 41597_2020_449_MOESM1_ESM.pdf]

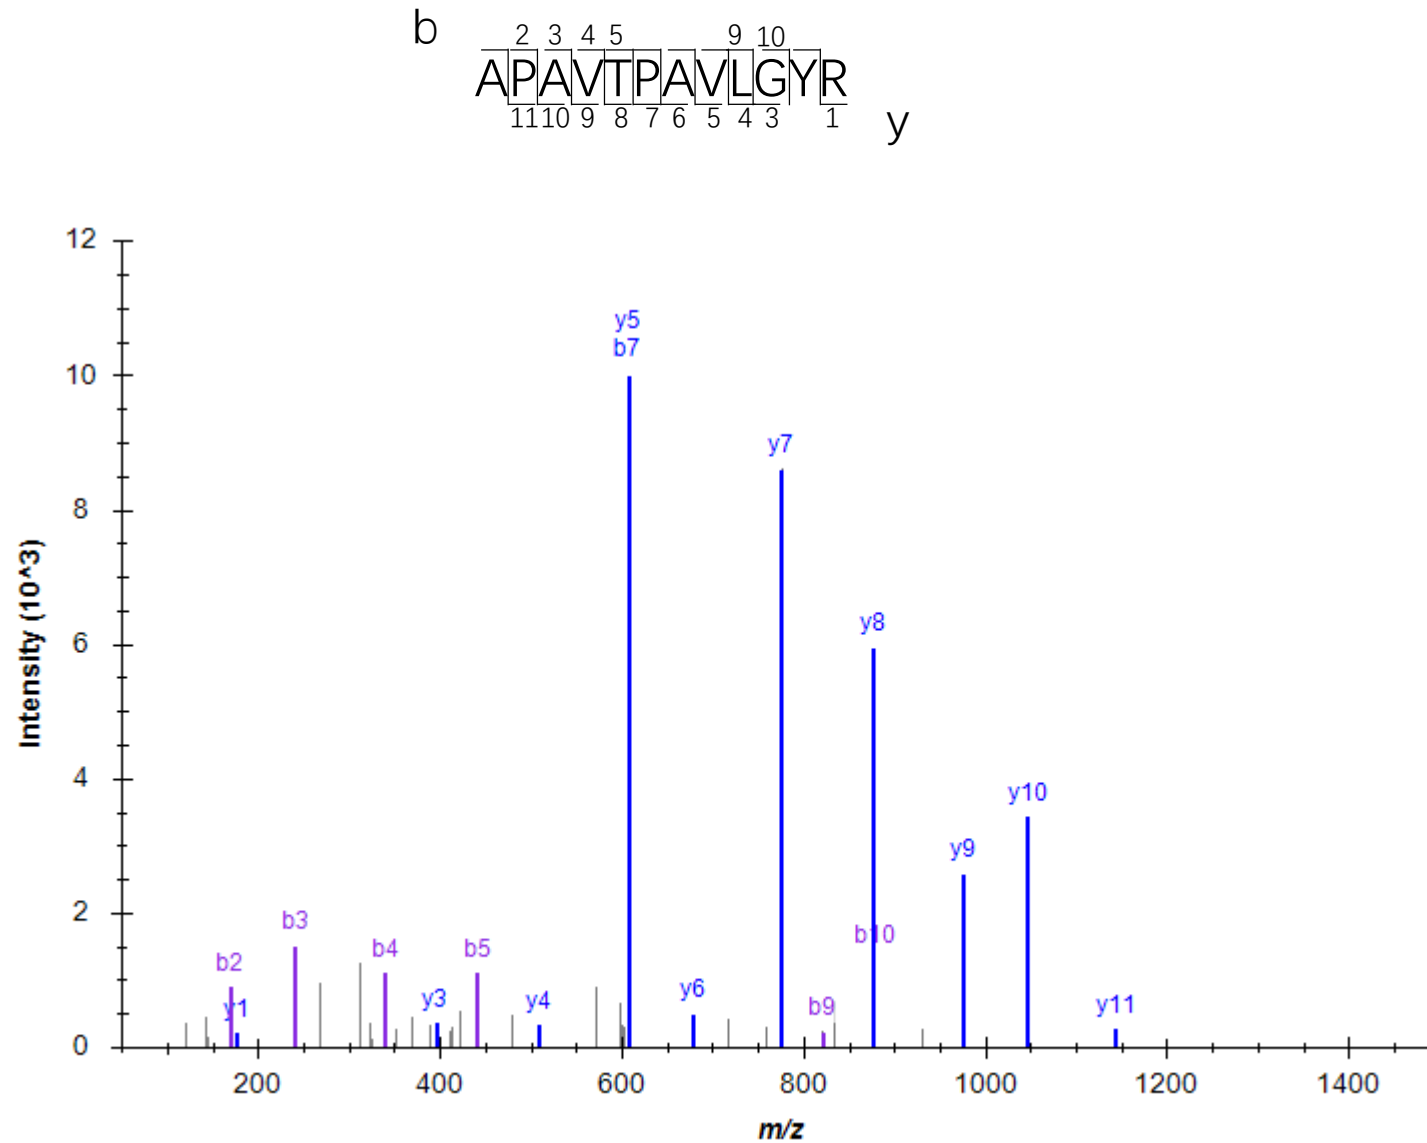

Supplementary Figure 1. The MS2 spectrum for one-hit peptide “APAVTPAVLGYR”. The detected b and y product ions have been labelled.
