# Supplementary material for: Generation of a murine SWATH-MS spectral library to quantify more than 11,000 proteins
Source: PubMed Central journal article supplement (PMC7099061; doi:10.1038/s41597-020-0449-z), 2020-03-26
Supplement: 41597_2020_449_MOESM2_ESM.pdf [file 41597_2020_449_MOESM2_ESM.pdf]

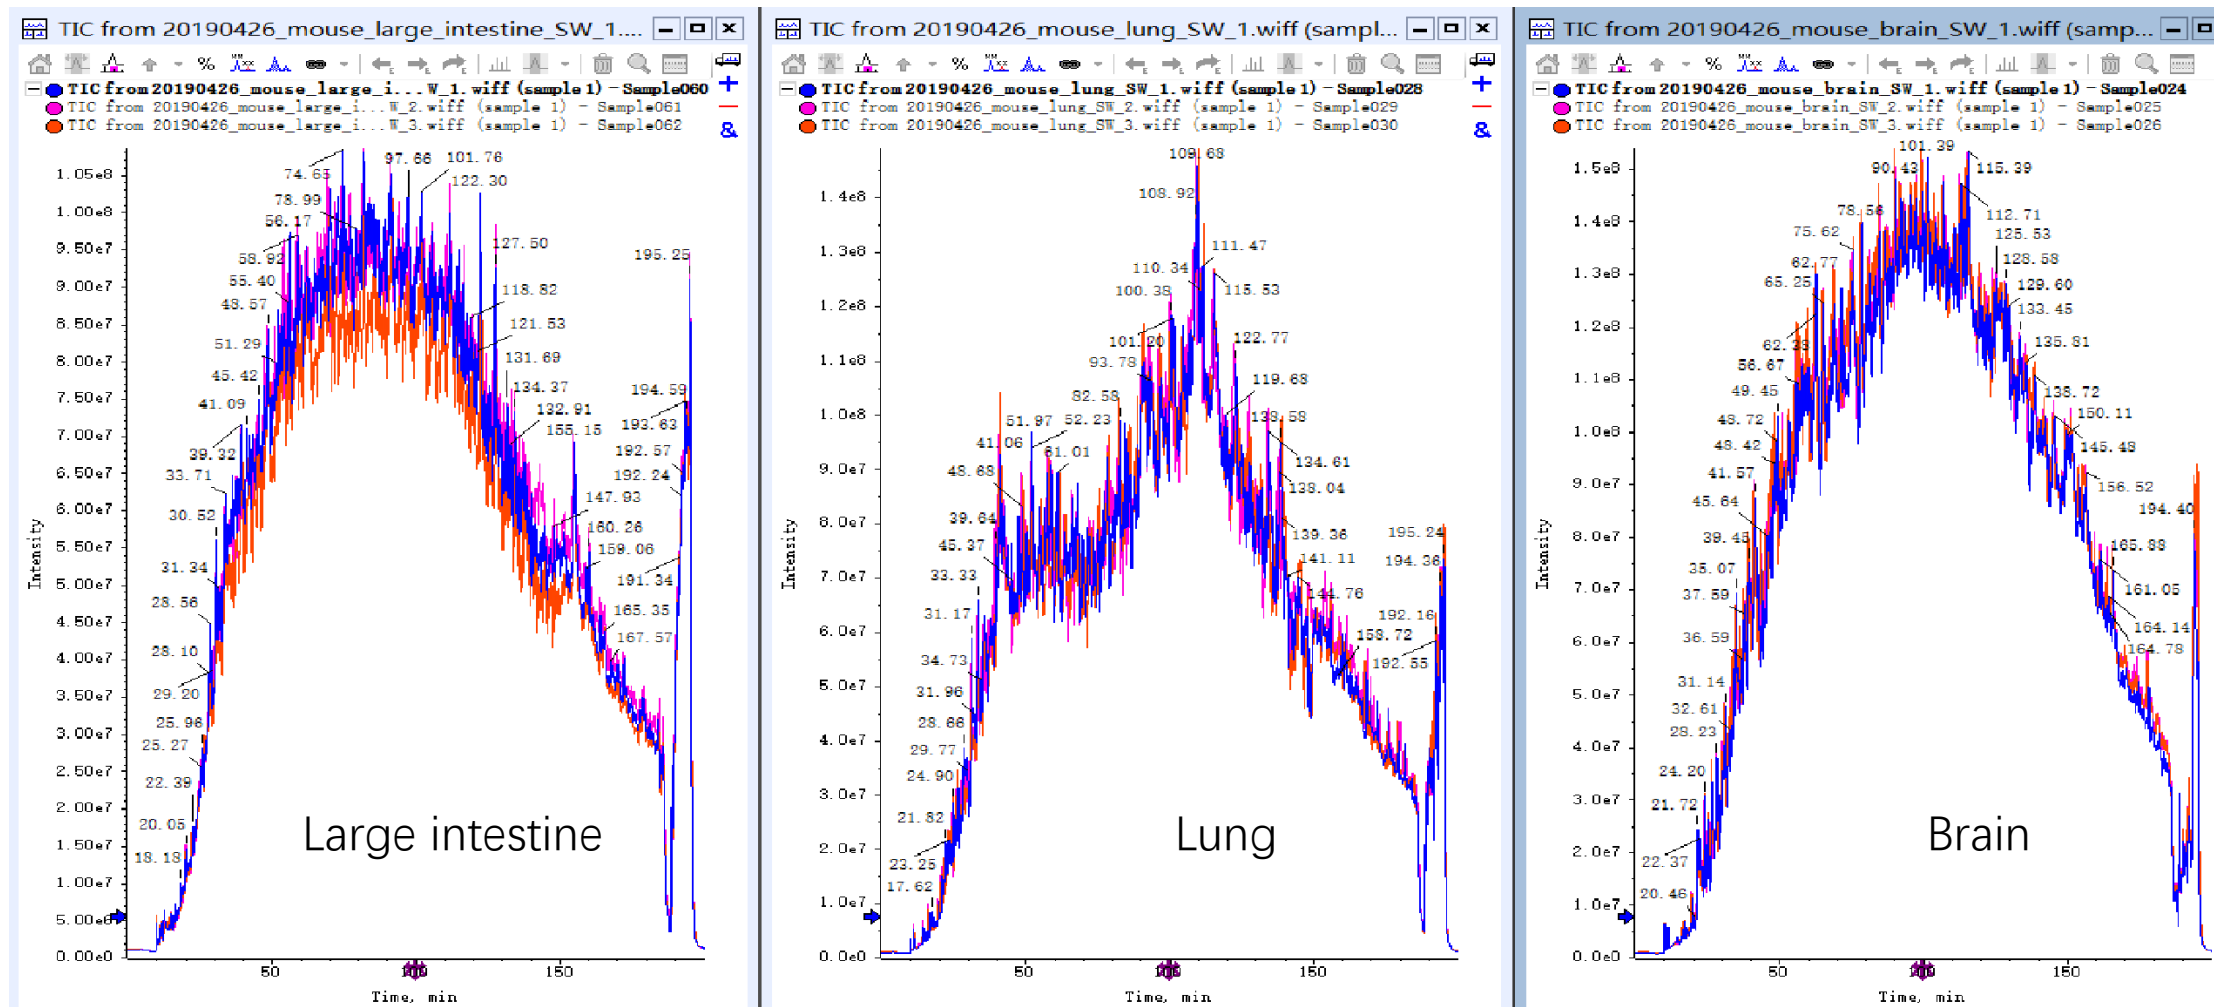

Supplementary Figure 2. The overlay of total ion chromatography (TIC) for three SWATH-MS runs in large intestine, lung and brain dataset.
